# Supplementary material for: Functionalization of Fe3O4 NPs by Silanization: Use of Amine (APTES) and Thiol (MPTMS) Silanes and Their Physical Characterization
Source: MDPI journal article supplement (doi:10.3390/ma9100826), 2016-10-12
Supplement: s1 [file s1]

# Supplementary Materials: Functionalization of $\text{Fe}_3\text{O}_4$ NPs by Silanization: Use of Amine (APTES) and Thiol (MPTMS) Silanes and Their Physical Characterization

Silvia Villa, Paola Riani, Federico Locardi and Fabio Canepa

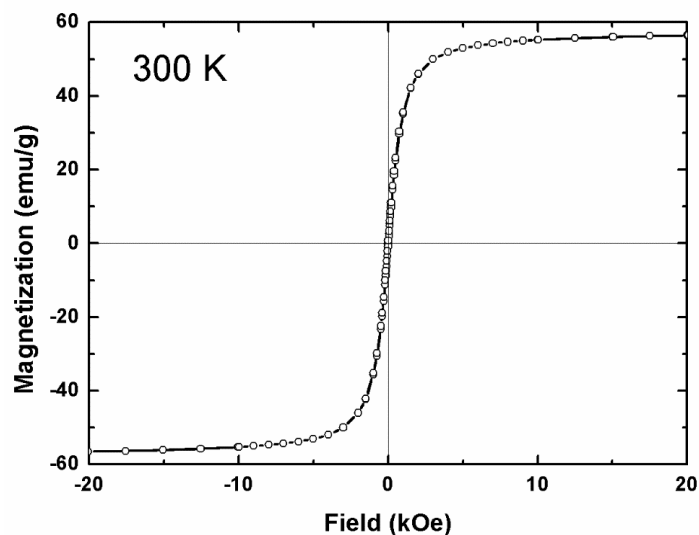

**Figure S1.** Room temperature isothermal magnetization of the bare  $\text{Fe}_3\text{O}_4$  NPs, displaying the absence of the coercivity, typical of the superparamagnetic regime.

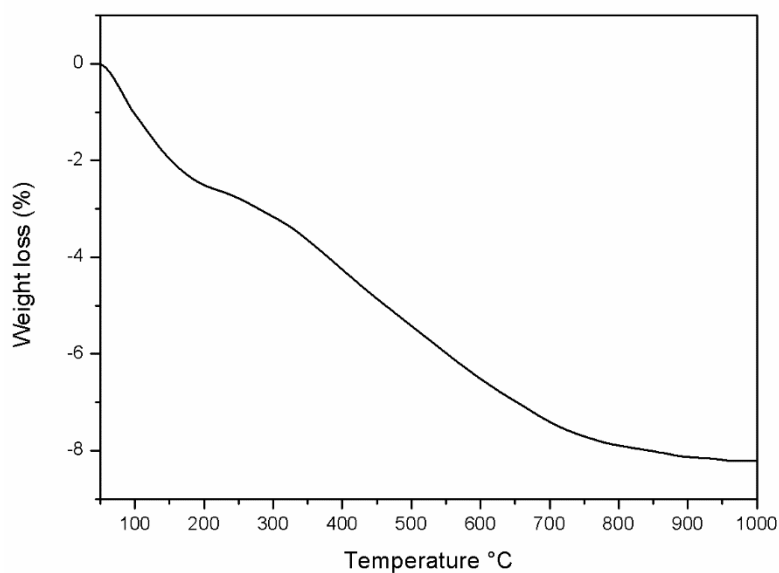

**Figure S2.** TGA analysis of  $\text{Fe}_3\text{O}_4@SiO_2@APTES$ .

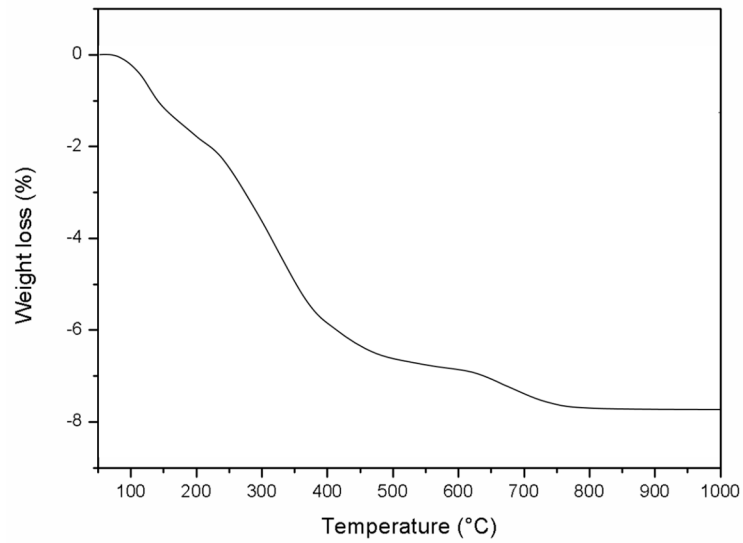

Figure S3. TGA analysis of Fe<sub>3</sub>O<sub>4</sub>@APTES.

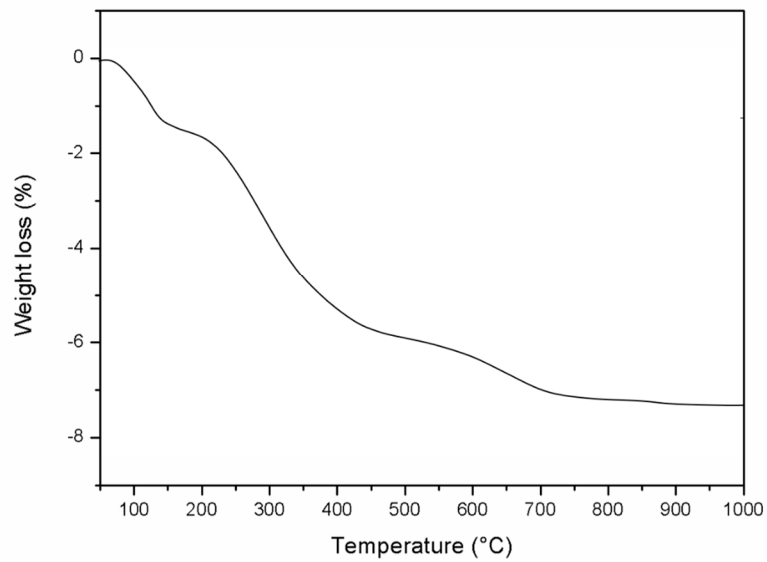

Figure S4. TGA analysis of Fe<sub>3</sub>O<sub>4</sub>@MPTMS.

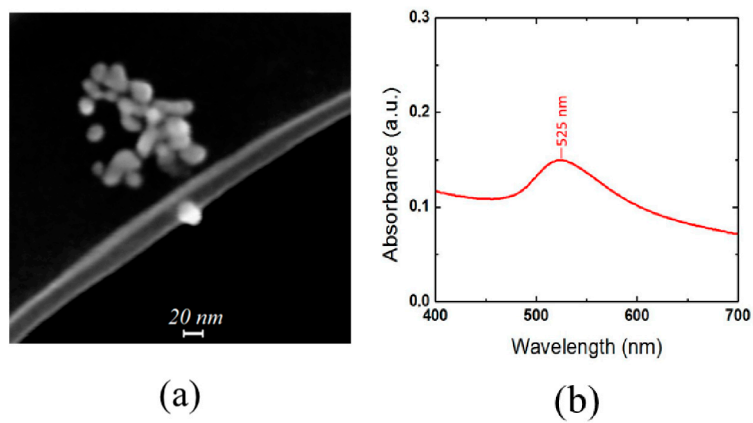

Figure S5. FE-SEM image of Gold NPs (a) and the relative UV-VIS spectrum (b).
